# Supplementary material for: DNAzyme catalytic beacons-based a label-free biosensor for copper using electrochemical impedance spectroscopy
Source: Royal Society of Chemistry journal article supplement (doi:10.1039/c5ra20641c), 2015-12-22
Supplement: c5ra20641c1.pdf [file c5ra20641c1.pdf]

# **DNzyme Catalytic Beacons-based a label-free biosensor for copper using electrochemical impedance spectroscopy**

Wenyong Hu<sup>a,b\*</sup>, Xiaobo Min<sup>a,b\*</sup>, Xinyu Li<sup>a,b</sup>, Shengxiang Yang<sup>a,b</sup>, Langbo Yi<sup>a,b</sup>, Liyuan Chai<sup>a,b</sup>

a School of Metallurgy and Environment, Central South University, Changsha, 410083, China,

b National Engineering Research Center for Pollution Control of Heavy Metals, Changsha 410083,

Hunan, PR China.

---

\* Corresponding author: Tel.: +86 13762157065; Fax.: +86 0731 88710171

E-mail: huwenyong07@126.com (W.Y. Hu). mxb@csu.edu.cn (X. B. Min)

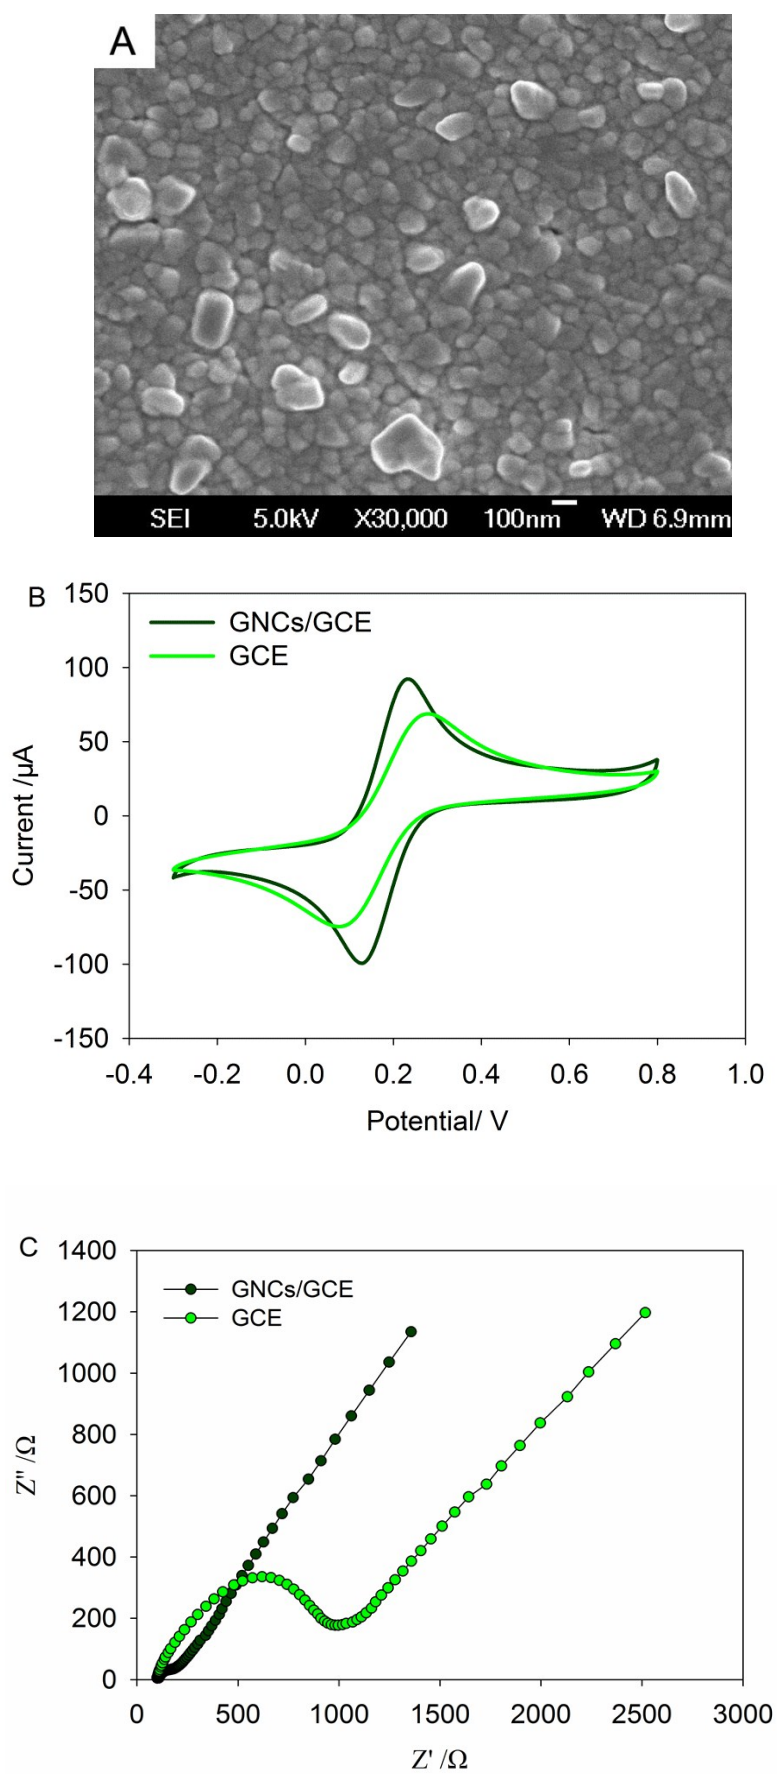

**Fig.S-1 (A)** The SEM image of GNCs. (B) Cyclic voltammety diagrams of GCE, GCE/ GNCs, using a 0.1 M KCl solution containing 5.0 mM ferro/ferricyanide, with potential range of  $-0.3$  to  $0.8$  V, and a

scan rate of  $100 \text{ mV}\cdot\text{s}^{-1}$ . (C) Electrochemical impedance spectra of GCE, GCE/ GNCs, using phosphate buffer (pH 7.4) containing 5 mM ferro/ferricyanide and 10 mM KCl, with frequency range of  $0.1\text{--}10^5 \text{ Hz}$ , a bias potential of 0.19 V vs. SCE and an AC amplitude of 5 mV.

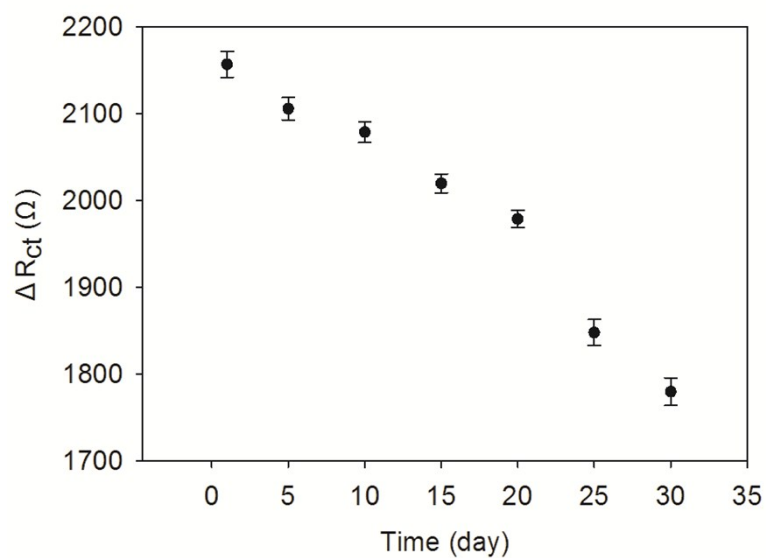

**Fig.S-2** The stability of the biosensor.
